# Supplementary material for: Chemically-modified graphenes for oxidation of DNA bases: analytical parameters
Source: Royal Society of Chemistry journal article supplement (doi:10.1039/c1an15631d), 2011-01-01
Supplement: c1an15631d.pdf [file c1an15631d.pdf]

## Chemically Modified Graphenes for Oxidation of DNA bases: Analytical Parameters

5 Madeline Shuhua Goh<sup>a</sup>, Alessandra Bonanni<sup>a</sup>, Adriano Ambrosi<sup>a</sup>, Zdeněk Sofer<sup>b</sup>, Martin Pumera<sup>\*a</sup>

<sup>a</sup> M. S. Goh, Dr. A. Bonanni, Dr. A. Ambrosi, Prof. M. Pumera; Division of Chemistry & Biological Chemistry, School of Physical and Mathematical Sciences, Nanyang Technological University, 21 Nanyang Link, Singapore 637371, Singapore; Fax: (65) 6791-196; E-mail: pumera@e.ntu.edu.sg

10 <sup>b</sup> Dr. Z. Sofer; Institute of Chemical Technology, Department of Inorganic Chemistry; Technická 5, 166 28 Prague 6, Czech Republic

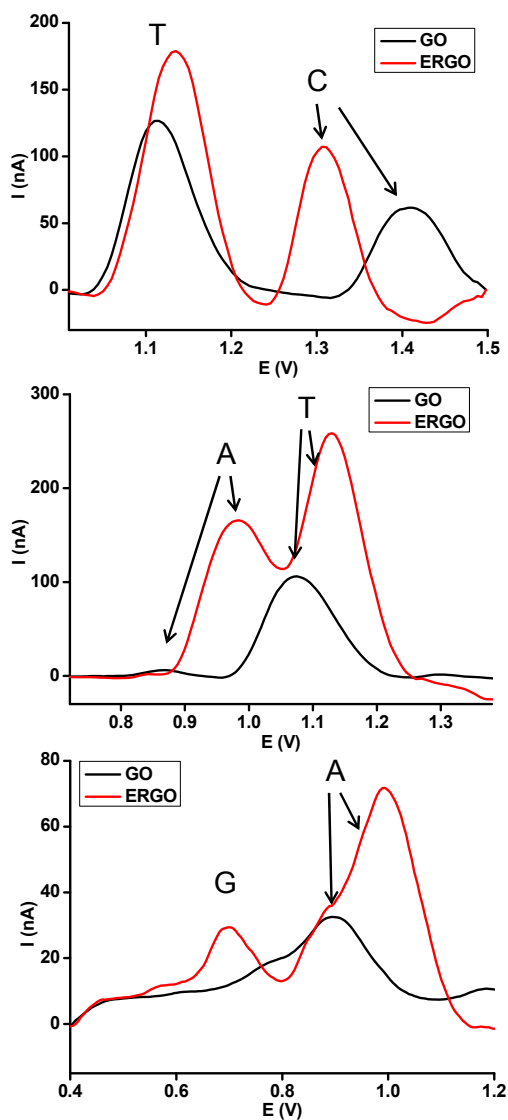

Figure S1. Peak-to-peak separation of neighbouring DNA bases (G-A; A-T and T-C) on graphene oxide (GO) and electrochemically reduced graphene oxide (ER-GO) in differential pulse voltammograms. Conditions: 50 mM phosphate buffer, pH 7.2.
